# Supplementary material for: First Tomographic Imaging of Mid-Crustal Doubling at the Abruzzi Outer Thrust Front, Central-Southern Italy
Source: Copernicus journal article supplement (doi:10.5194/egusphere-2025-3844), 2025-09-18
Supplement: Supplementary file 1 [file egusphere-2025-3844-supplement.pdf]

# Supplement for: First Tomographic Imaging of Mid-Crustal Doubling at the Abruzzi Outer Thrust Front, Central-Southern Italy

Rita de Nardis<sup>1,2</sup>, Donato Talone<sup>1,2</sup>, Luca De Siena<sup>2,3</sup>, Maria Adelaide Romano<sup>4</sup>, Francesco Brozzetti<sup>1,2</sup>, Giusy Lavecchia<sup>1,2</sup>

- 5
- <sup>1</sup>Department of Sciences, Study University “G. d’Annunzio” Chieti – Pescara, Chieti, 66013, Italy

<sup>2</sup>CRUST – Interuniversity Centre for 3D Seismotectonics with Territorial Applications, Chieti, 66013, Italy

<sup>3</sup>Department of Physics and Astronomy (DIFA), Alma Mater Studiorum University of Bologna, Bologna, 40127, Italy

<sup>4</sup>National Institute of Oceanography and Applied Geophysics – OGS, Trieste, 34010, Italy
- Correspondence to: Rita de Nardis (rita.denardis@unich.it)

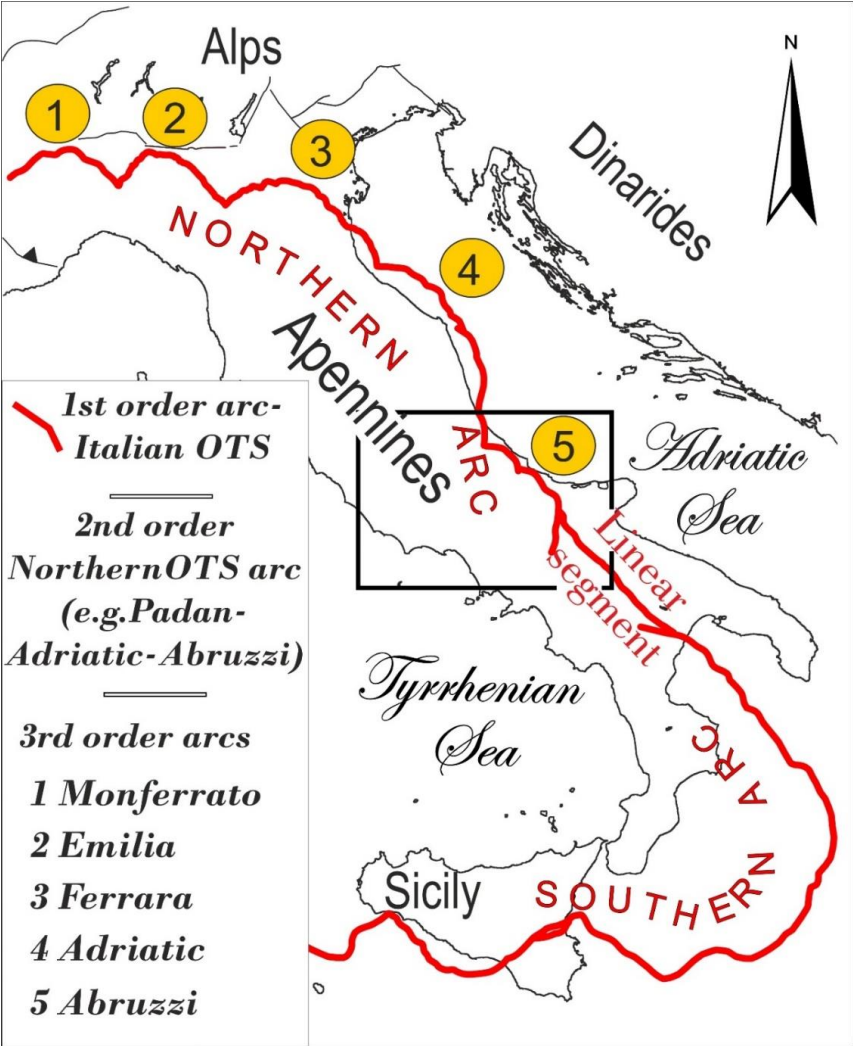

Figure S1. The Italian Outer Thrust System and its second and third-order arcs.

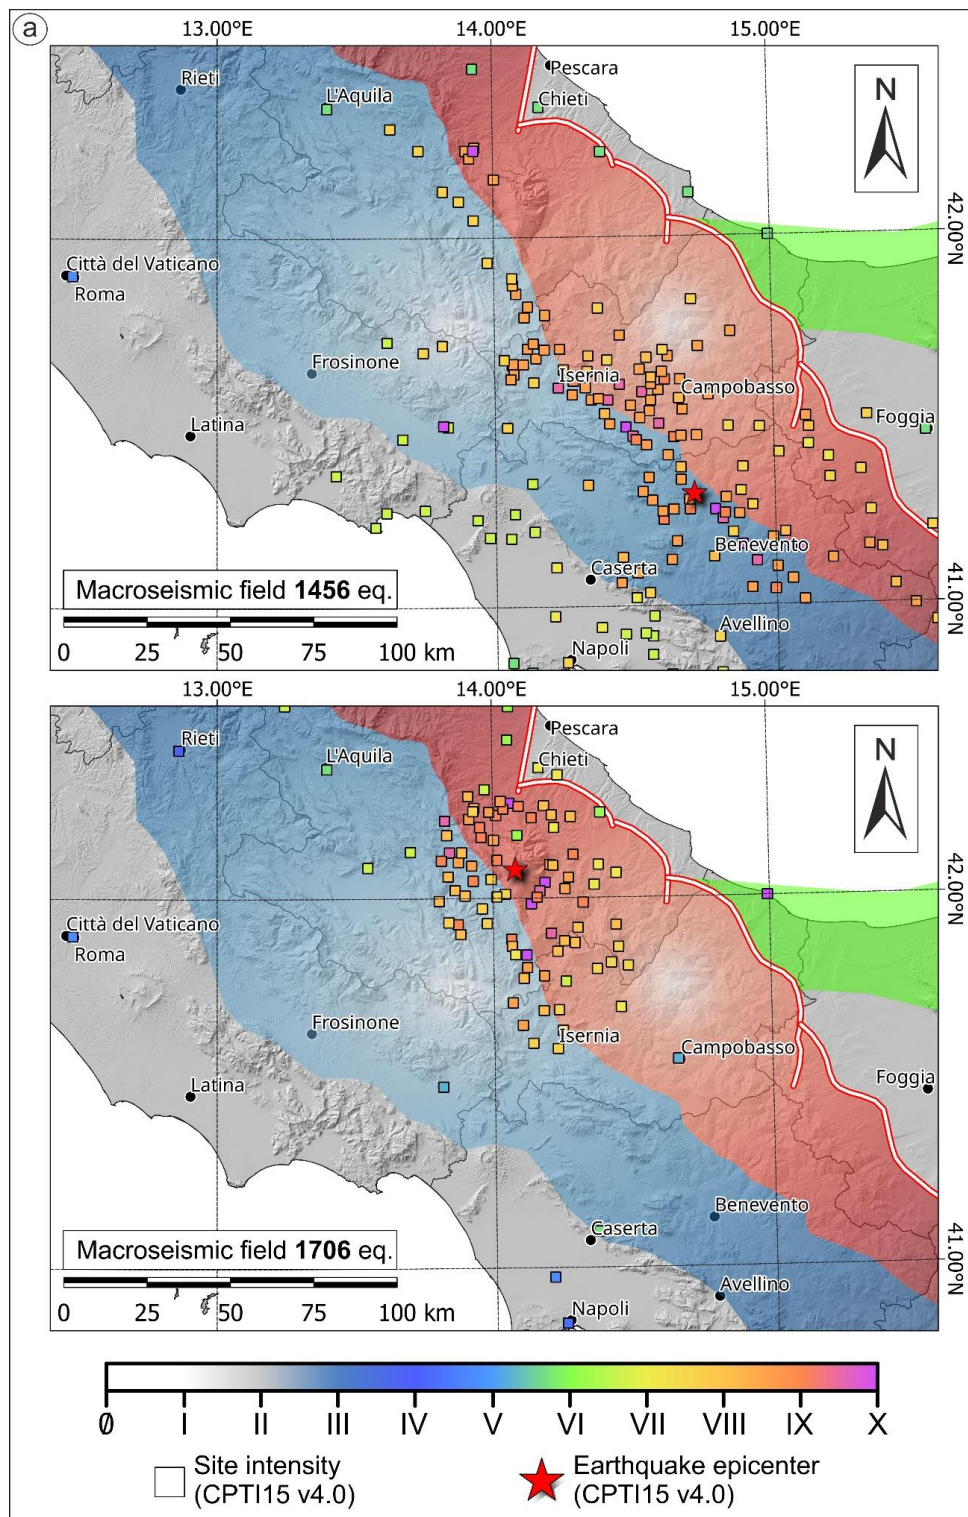

CONTINUED

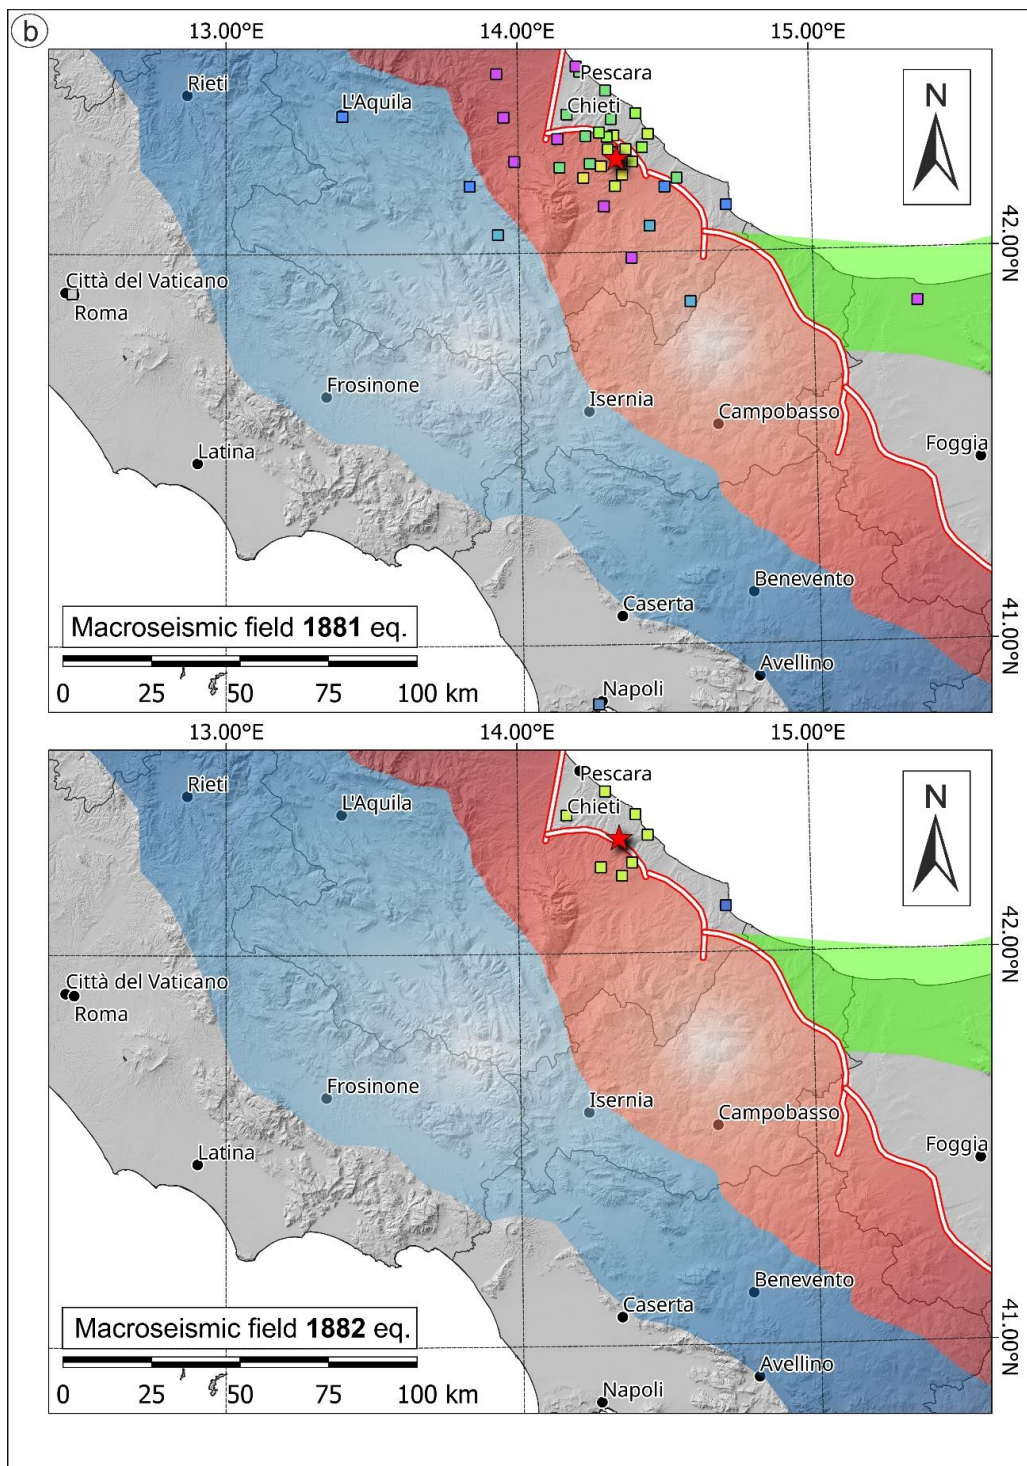

15 CONTINUED



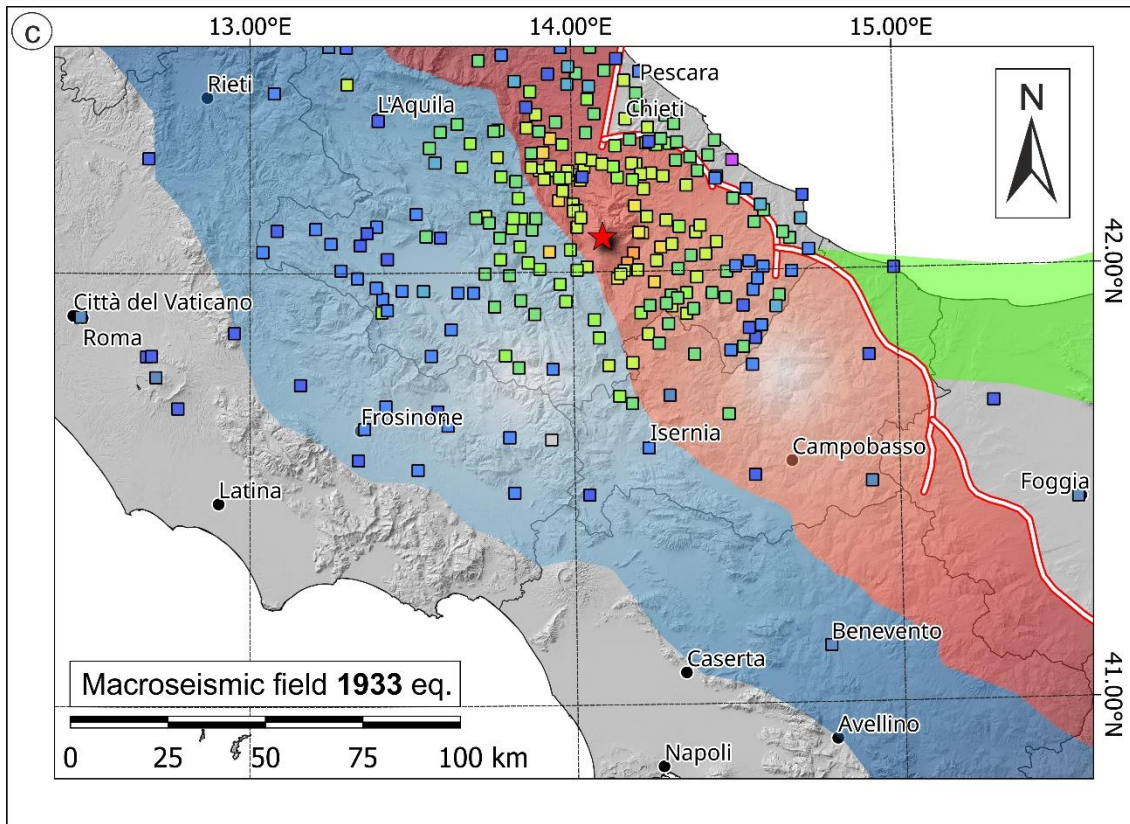

**Figure S2. Macroseismic fields of the most significant historical earthquakes occurred in the study area as reported in CPTI15 (Rovida et al., 2020, 2022). a) 1456 ( $I_o$ =XI,  $M_w$ =7.2) and 1706 ( $I_o$ =X-XI,  $M_w$ =6.8). b) 1881 ( $I_o$ =VII-VIII,  $M_w$ =5.4) and 1882 ( $I_o$ =VII,  $M_w$ =5.3). c) 1933 ( $I_o$ =IX,  $M_w$ =5.9). The legend is common and shown in the first panel.**

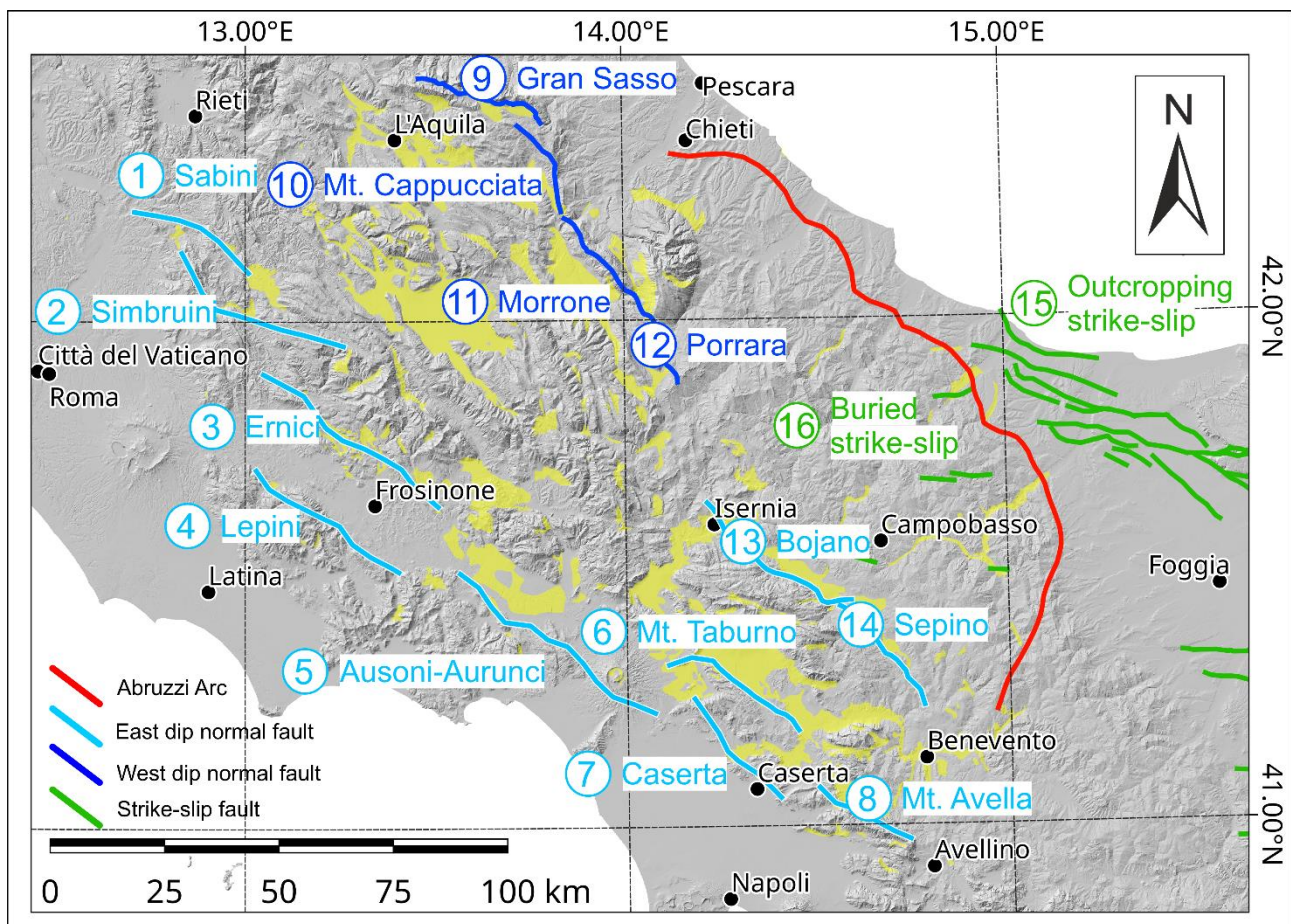

**Figure S3.** Schematic fault pattern described in the text (Sect. 2). Yellow polygons are quaternary deposits highlighting the position of intramountain basins.



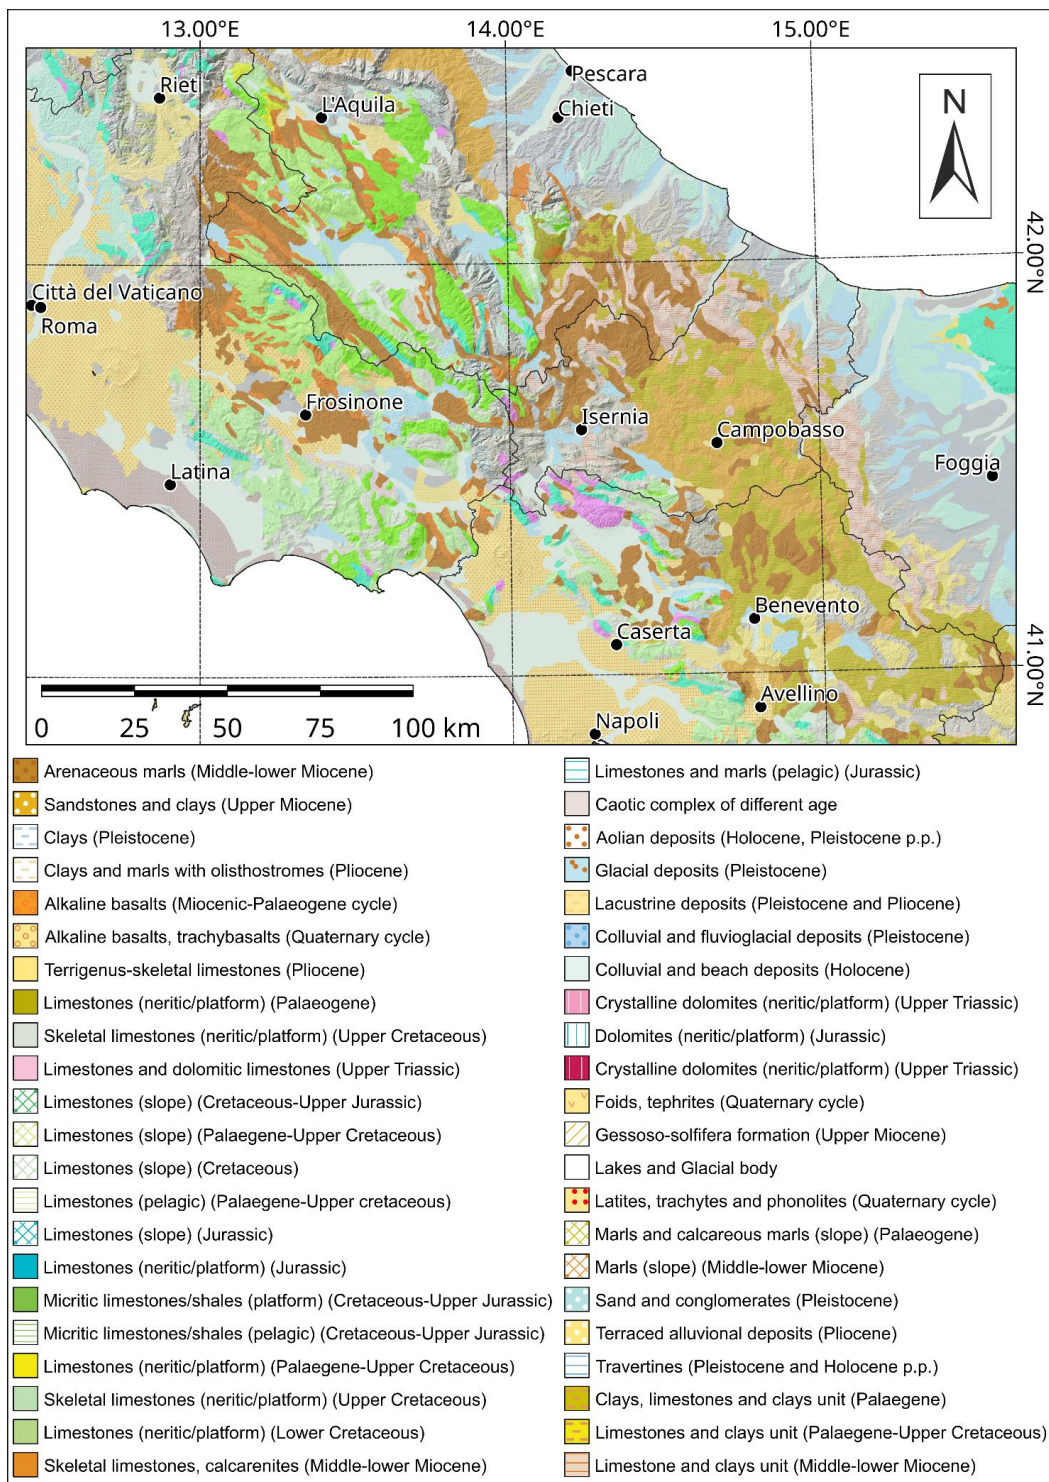

**Figure S4. Geological map of central-southern Italy as reported in the Geological and Lithological Units of Italy map at the scale of 1:500,000 (<http://portalesgi.isprambiente.it/it/lista-servizi-wms/Geological%20Maps>).**

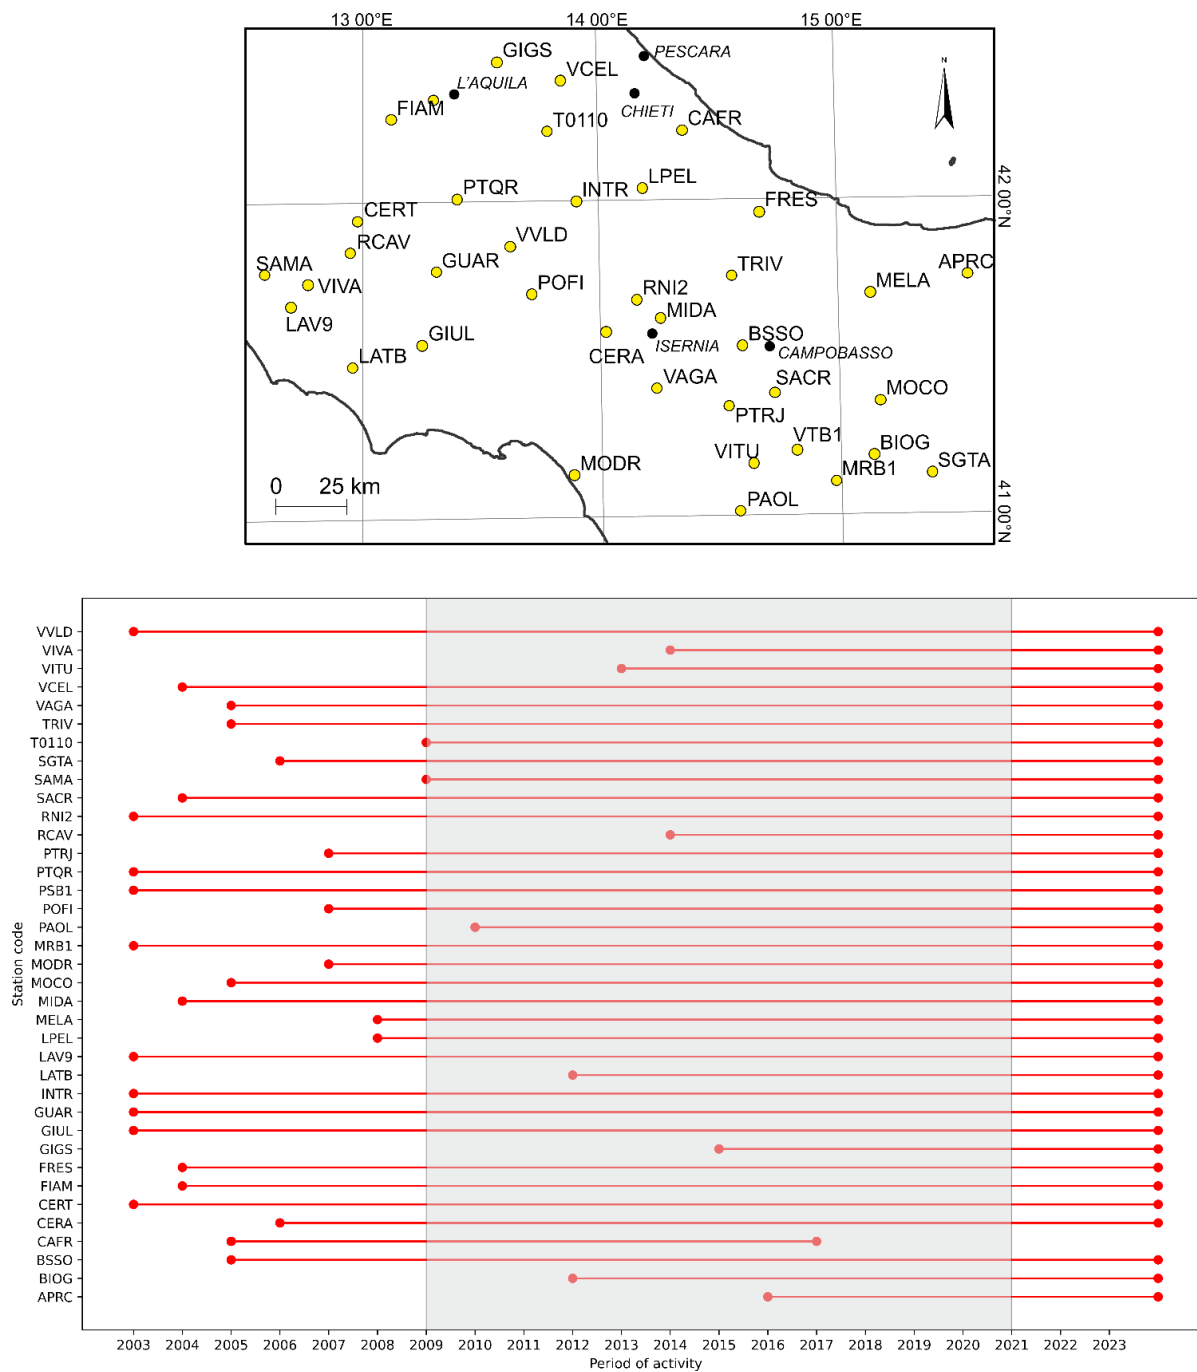

**Figure S5. Map (upper panel) and activity time (lower panel) of the seismic stations used for travel time seismic tomography. The grey patch represents the period considered in this study.**

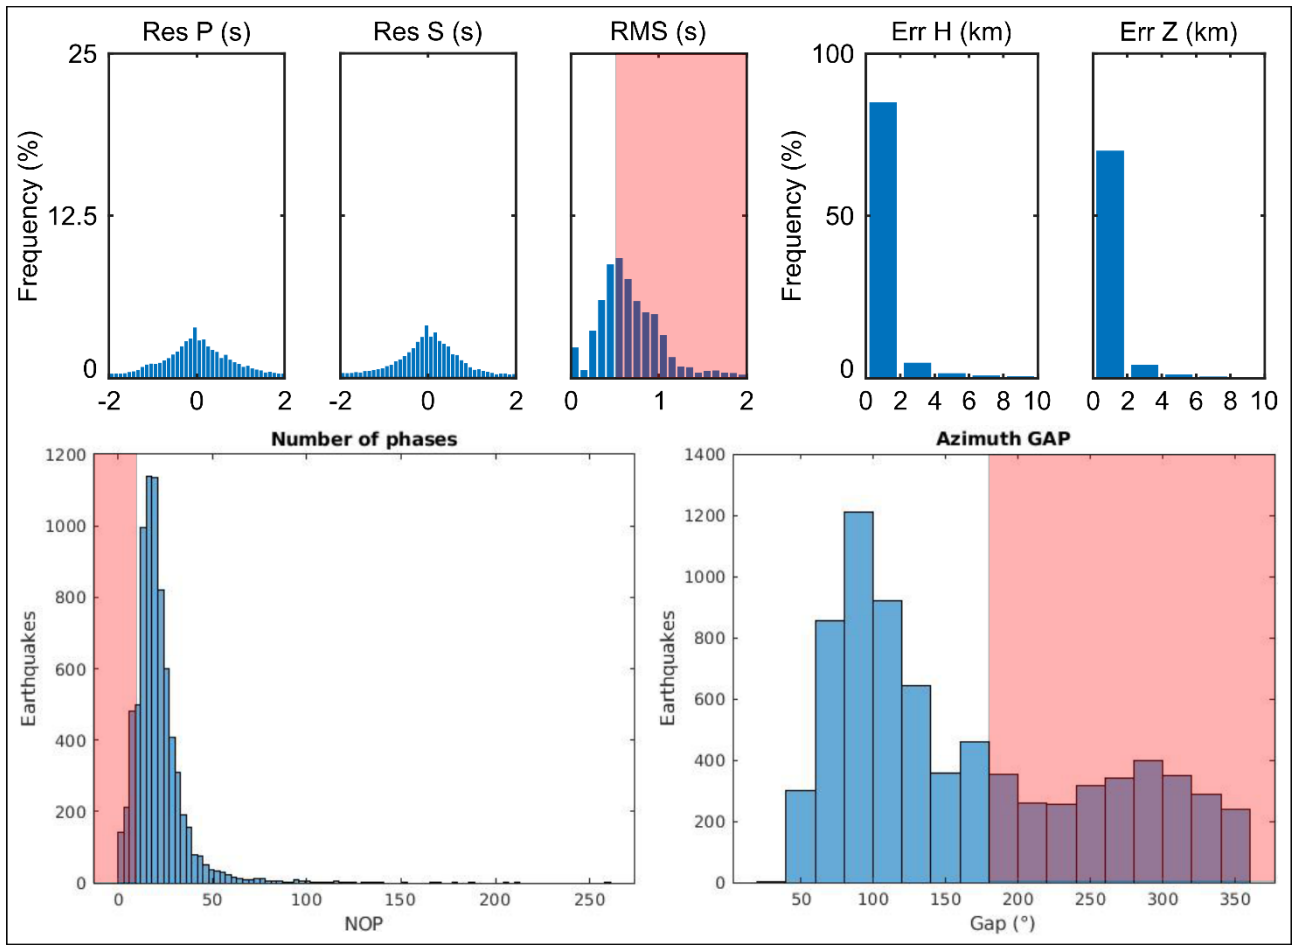

Figure S6. General characteristics of initial and final earthquake location datasets used for seismic tomography. Upper panel: statistical parameters of the preliminary earthquake location performed using the 1D model from (Trionfera et al., 2019). Bottom left side: total number of phases (NOP) histogram recognized for each earthquake at the different stations (sum of P and S for all the stations triggered). Bottom right side: azimuthal gap for the earthquakes in the catalog. Red patches represent the discarded earthquakes after filtering the hypocentral solutions for  $\text{RMS} \leq 0.5$  s, number of phases  $\geq 10$ , and azimuthal gap  $\leq 180^\circ$ .



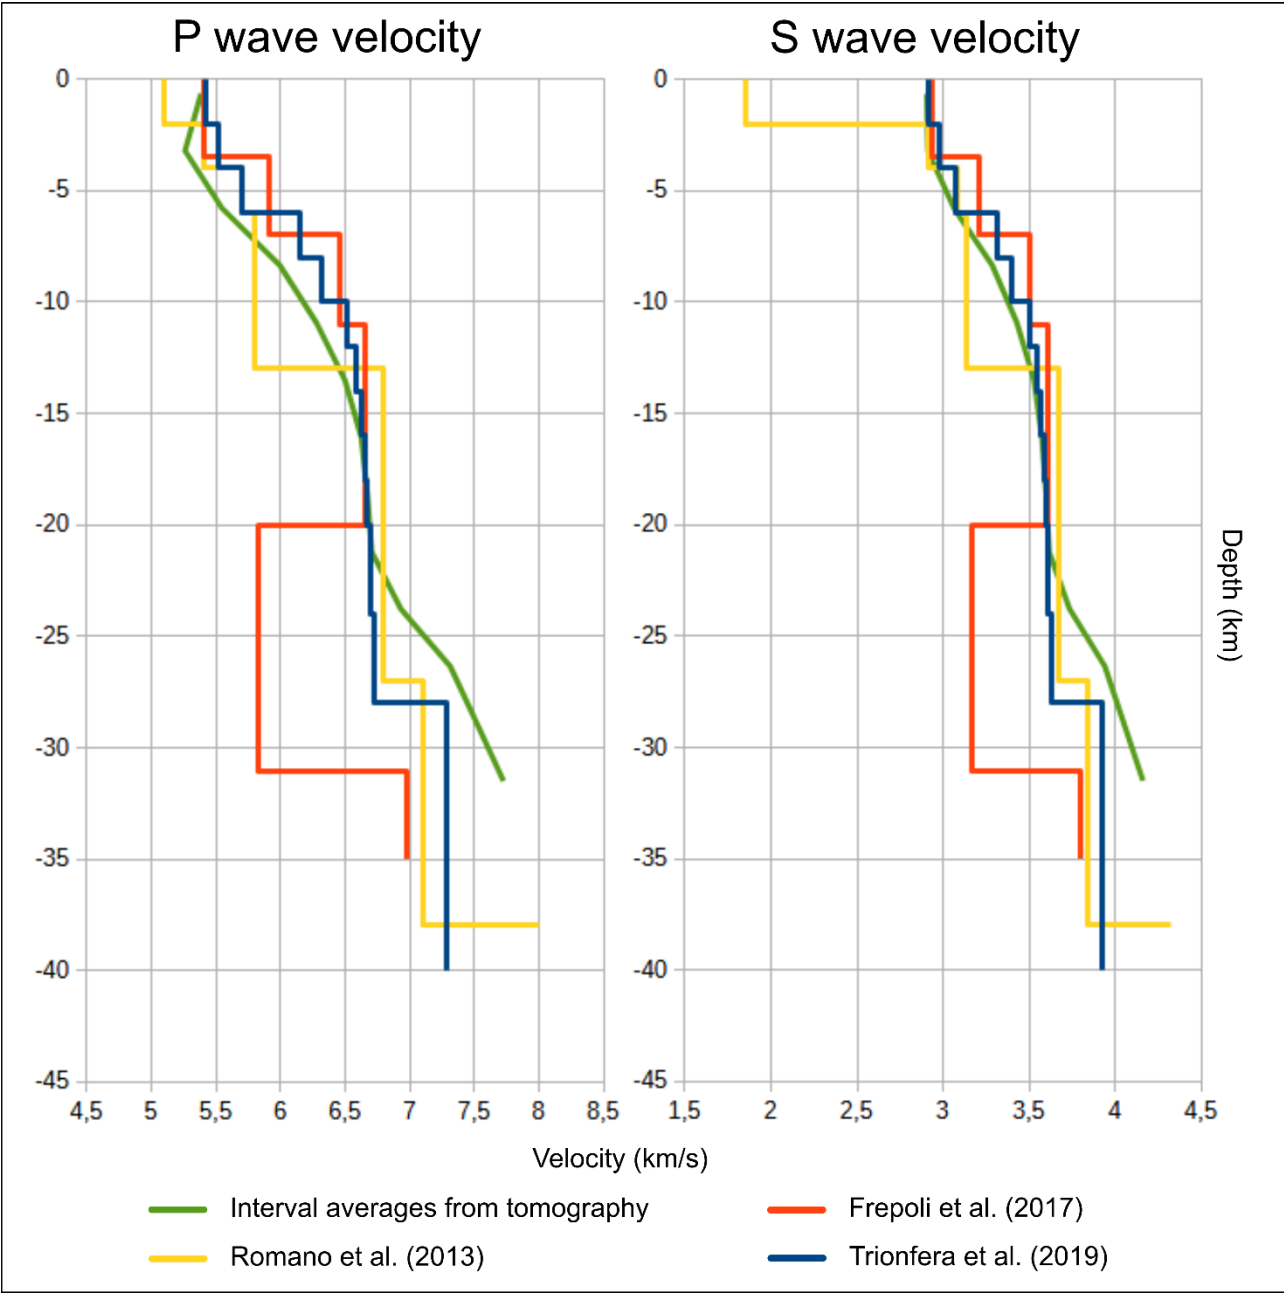

Figure S7. Comparison of the velocity models. Graphical comparison of 1D velocity models (Frepoli et al., 2017; Romano et al., 2013; Trionfera et al., 2019) used in this study as input for the tomographic process. To express the 3D model in a one-dimensional form, we considered the mean of each depth layer in the grid. The velocity models have also been used for re-locating the earthquakes before performing the travel time tomography.

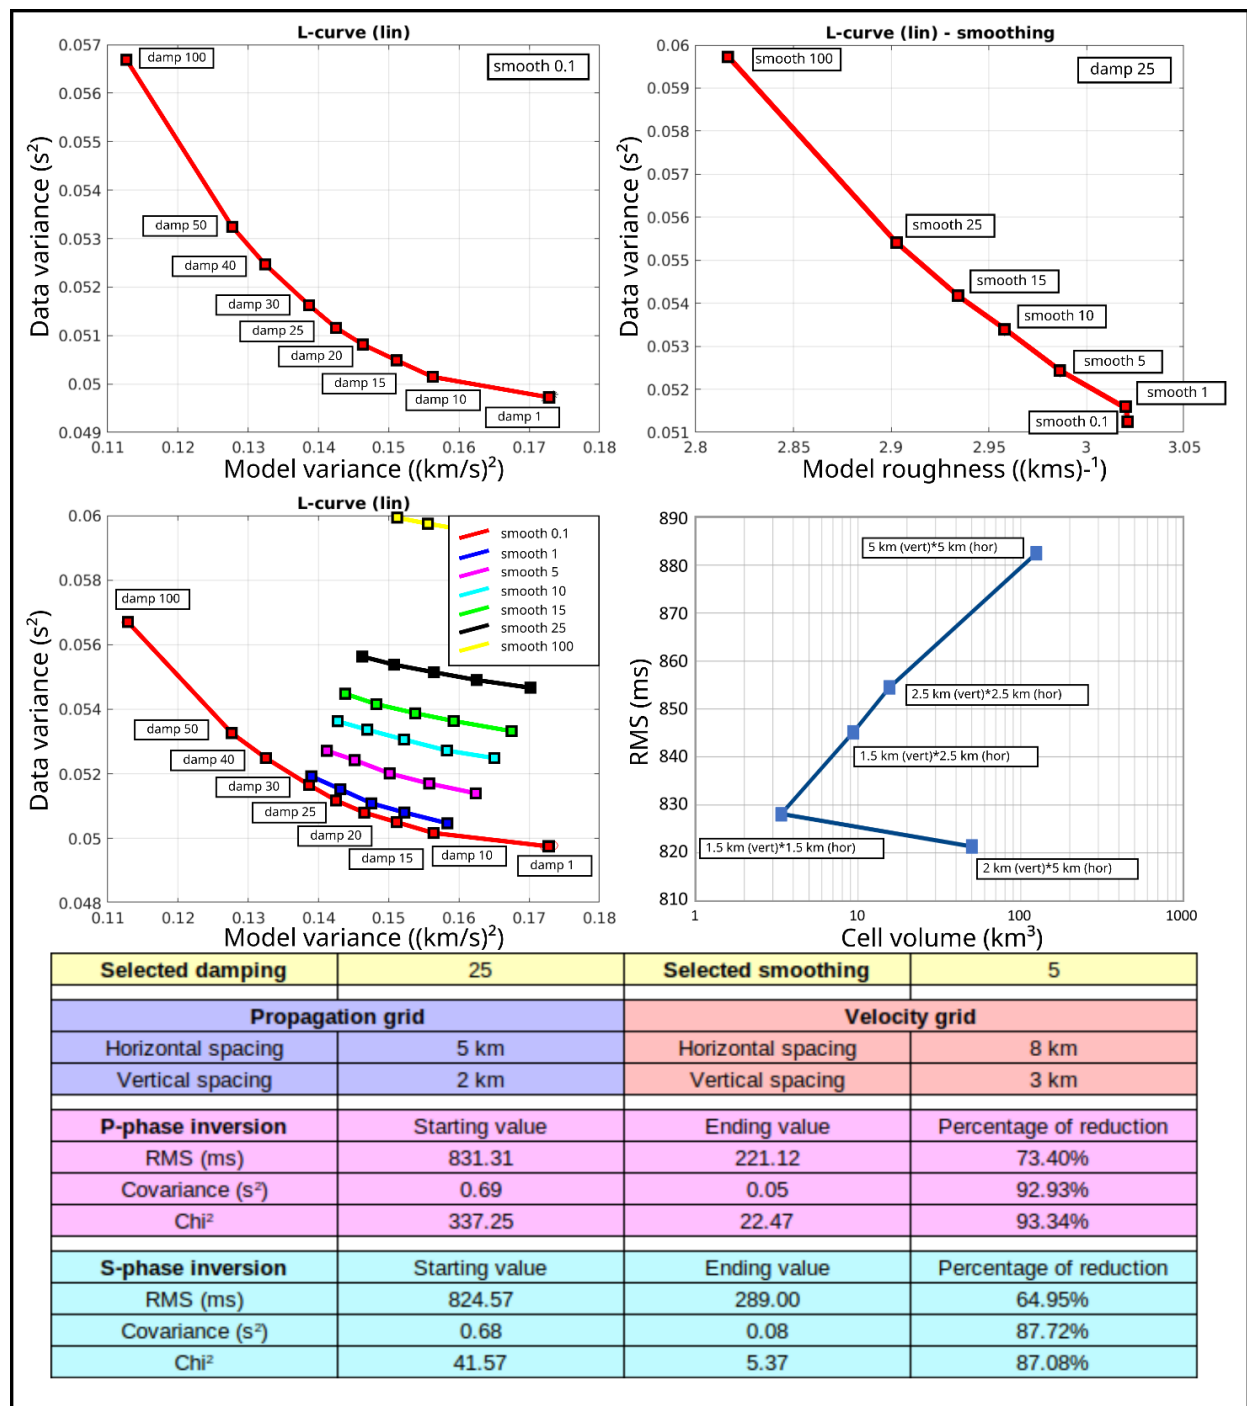

Figure S8. Inversion parameters for the seismic tomographic process. The trade-off curves have been used to select the best values for damping and smoothing parameters. Top-left: data variance vs model variance, having a fixed smoothing and variable damping; top-right: data variance vs model roughness, having a fixed damping and a variable smoothing; bottom-left: data variance vs model variance, having variable smoothing and damping; bottom-right: influence of grid spacing on the starting RMS value. The table summarizes the inversion parameters, grid dimension, and misfit reduction for P and S tomographic models.

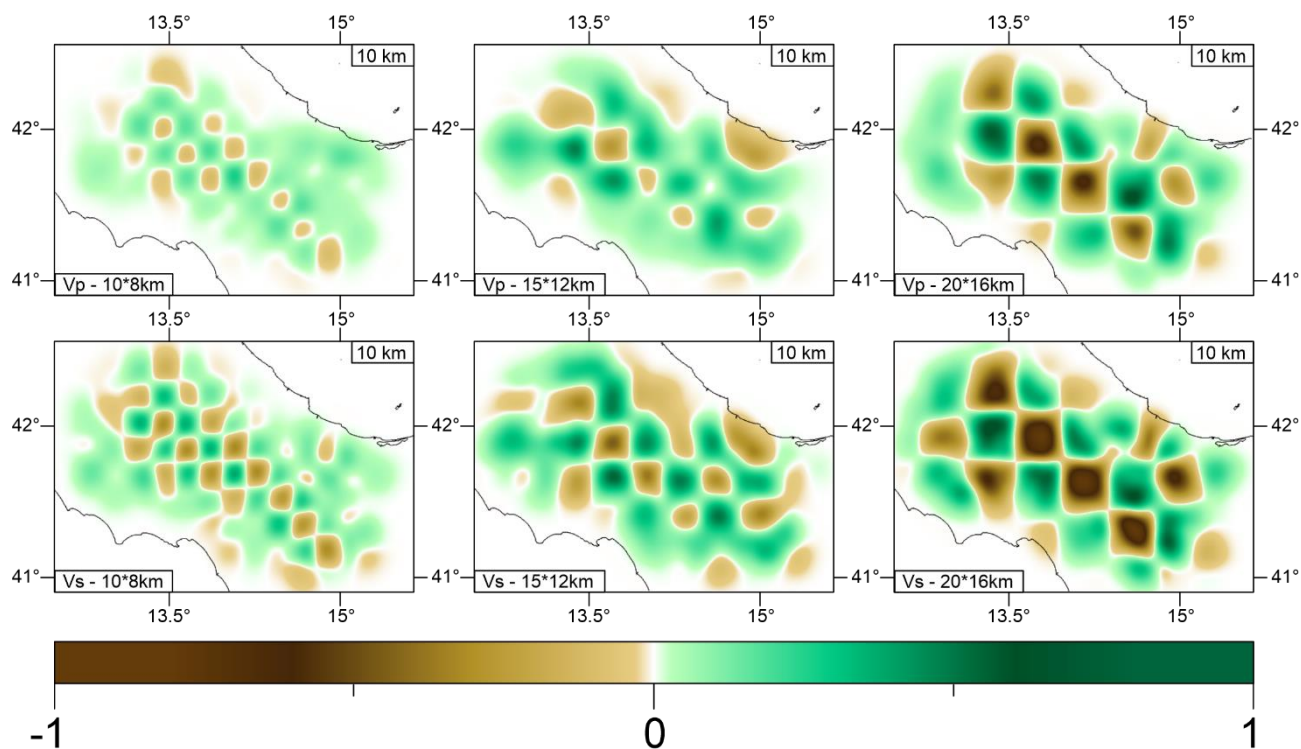

Figure S9. Checkerboard tests are represented on a horizontal section by cutting the model at 10 km. Each row refers to a model: the first row is the P-model, the second one is the S-model. Each column shows a different dimension of the checkerboard cells: in the first one, the cells are 10 km horizontal and 8 km vertical; in the second one, the checkerboard is 15 km horizontal and 12 km vertical; in the third one, the cells are 20 km horizontal and 16 km vertical. Seismic velocity is represented as a variation in km/s from uniform fixed values of 6.4 km/s for the P model and 3.4 km/s for the S model (median of the 1D starting velocity model).



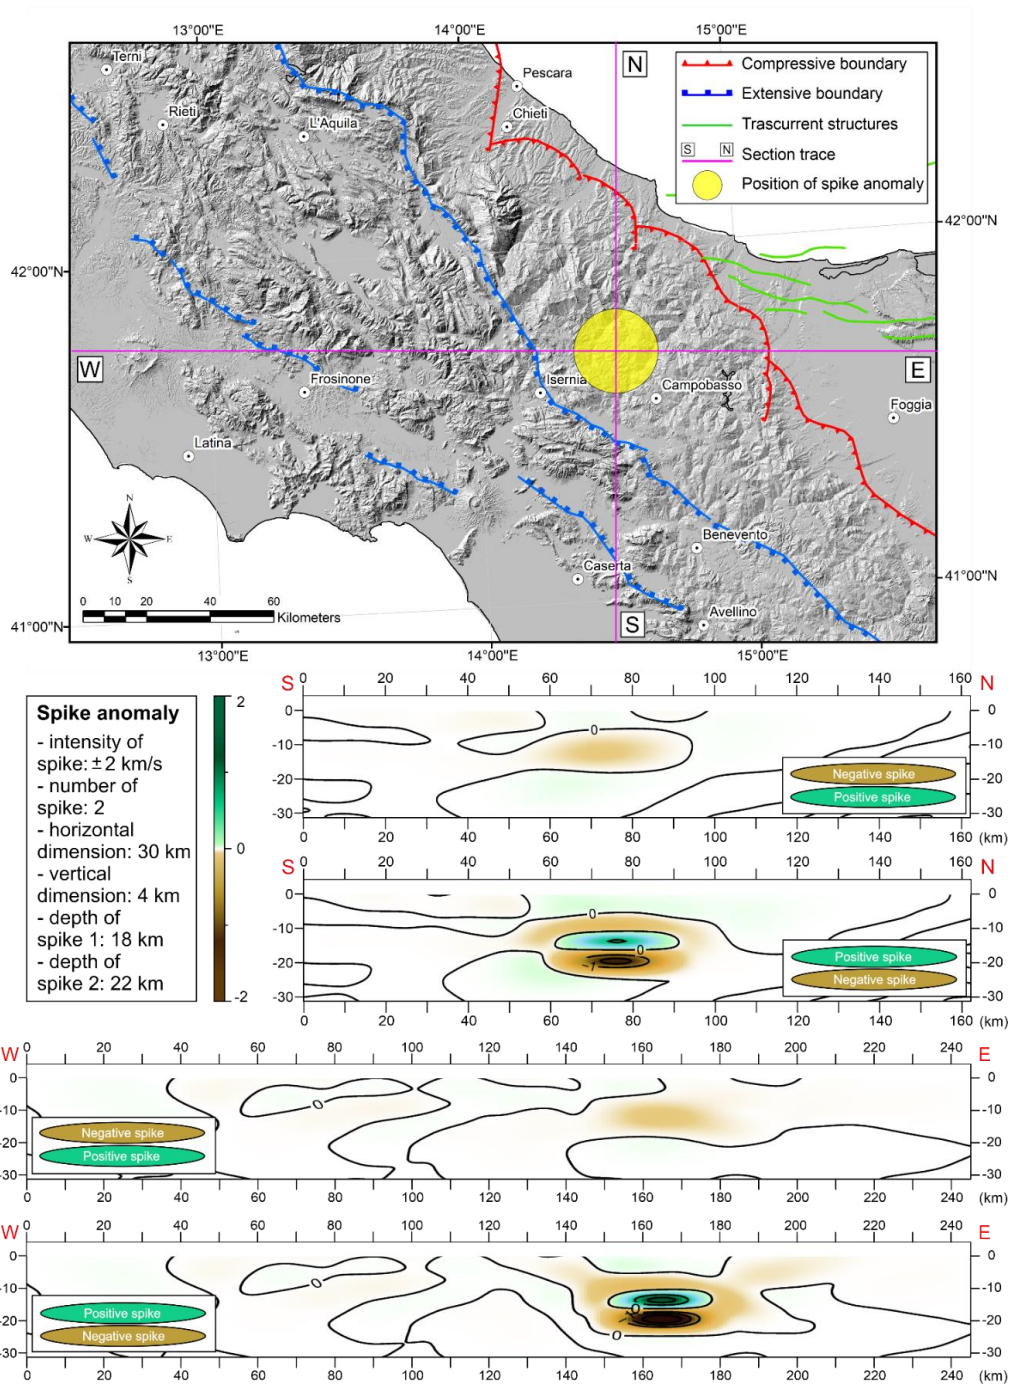

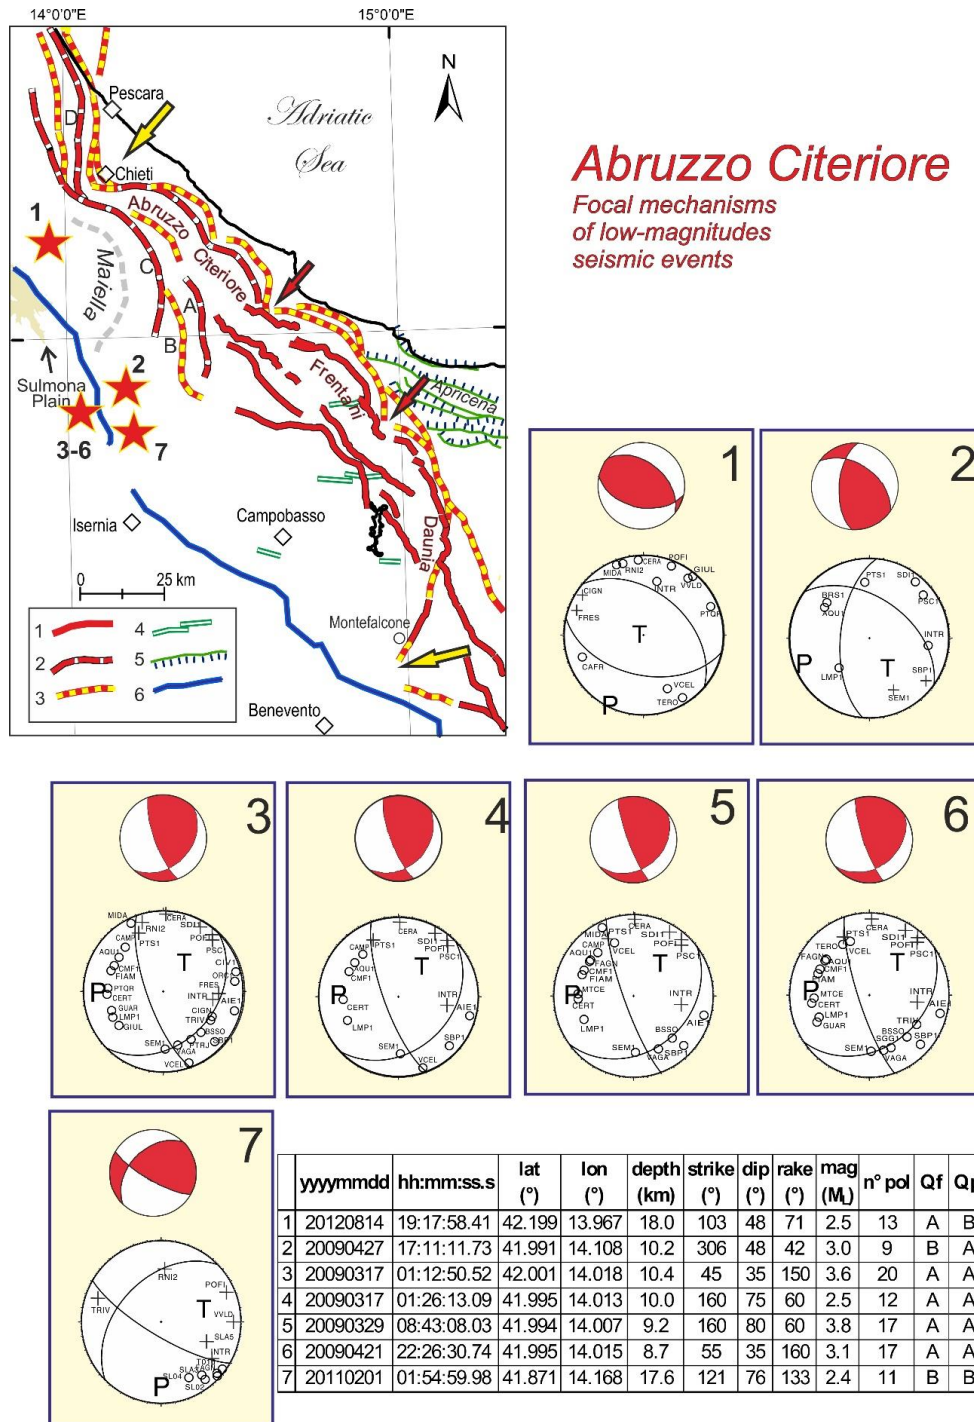

**Figure S11.** Focal mechanism solutions computed in this study using data from the National Seismic Network, temporary network, and Abruzzo network (Romano et al., 2013). Red stars indicate the position of the events for which the focal mechanism has been performed. Structural keys in the map are the same as in Figure 3 of the main text.

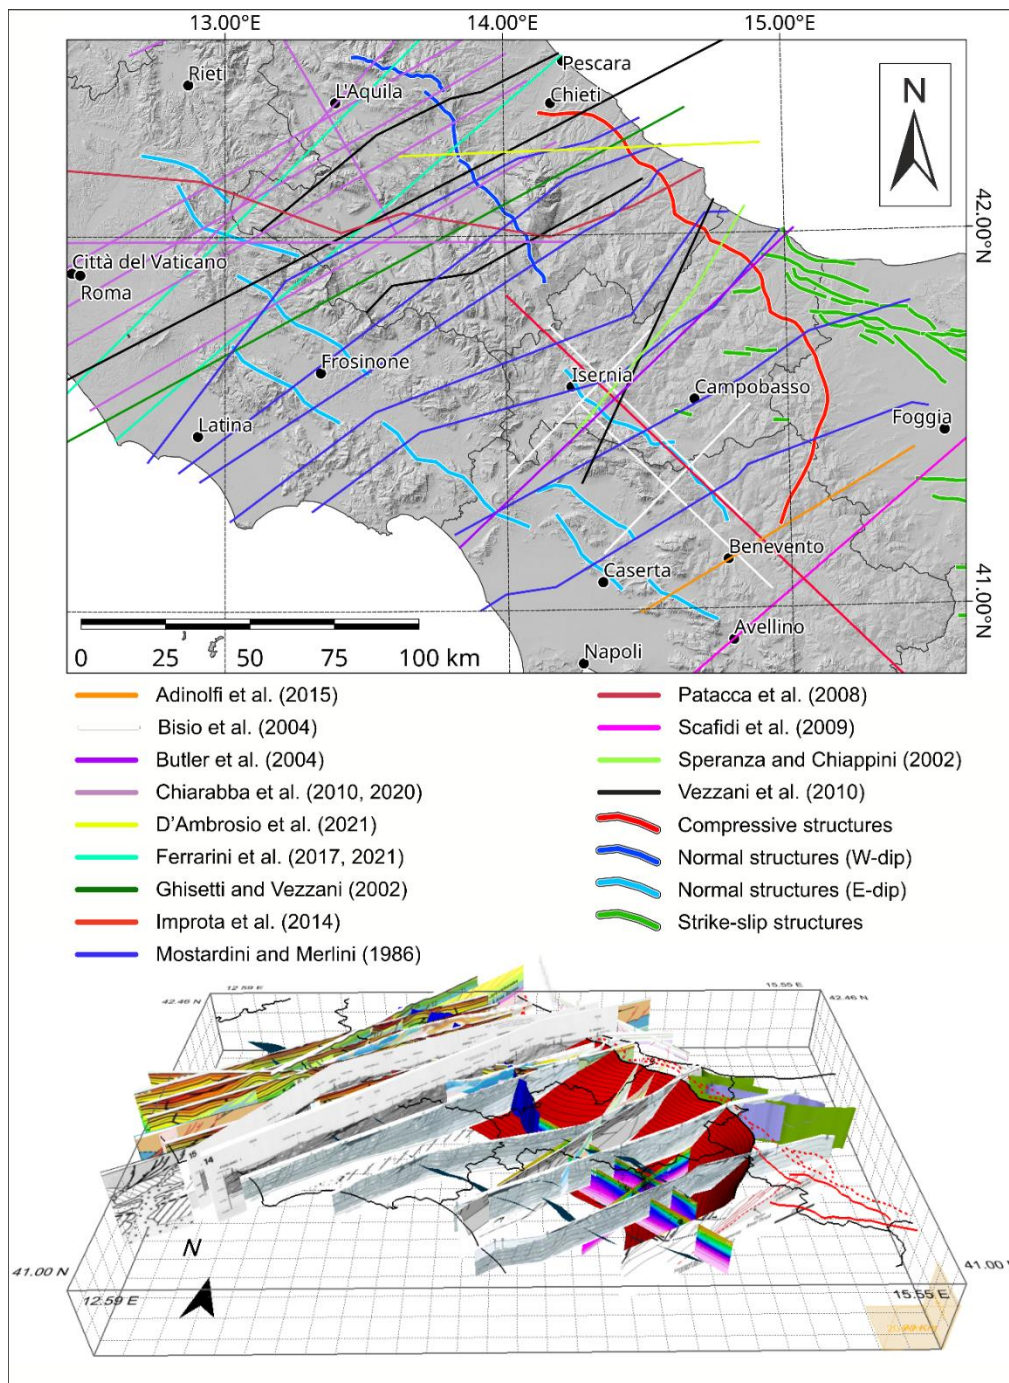

**Figure S12.** Geological and geophysical sections collected for building the 3D model of the study area (Adinolfi et al., 2015; Bisio et al., 2004; Butler et al., 2004; Chiarabba et al., 2010, 2020; D'Ambrosio et al., 2021; Ferrarini et al., 2017, 2021; Ghisetti and Vezzani, 2002; Improta et al., 2014; Mostardini and Merlini, 1986; Patacca et al., 2008; Scafidi et al., 2009; Speranza and Chiappini, 2002; Vezzani et al., 2010). Other bibliographic citations in the main text refer to structural maps without associated sections.



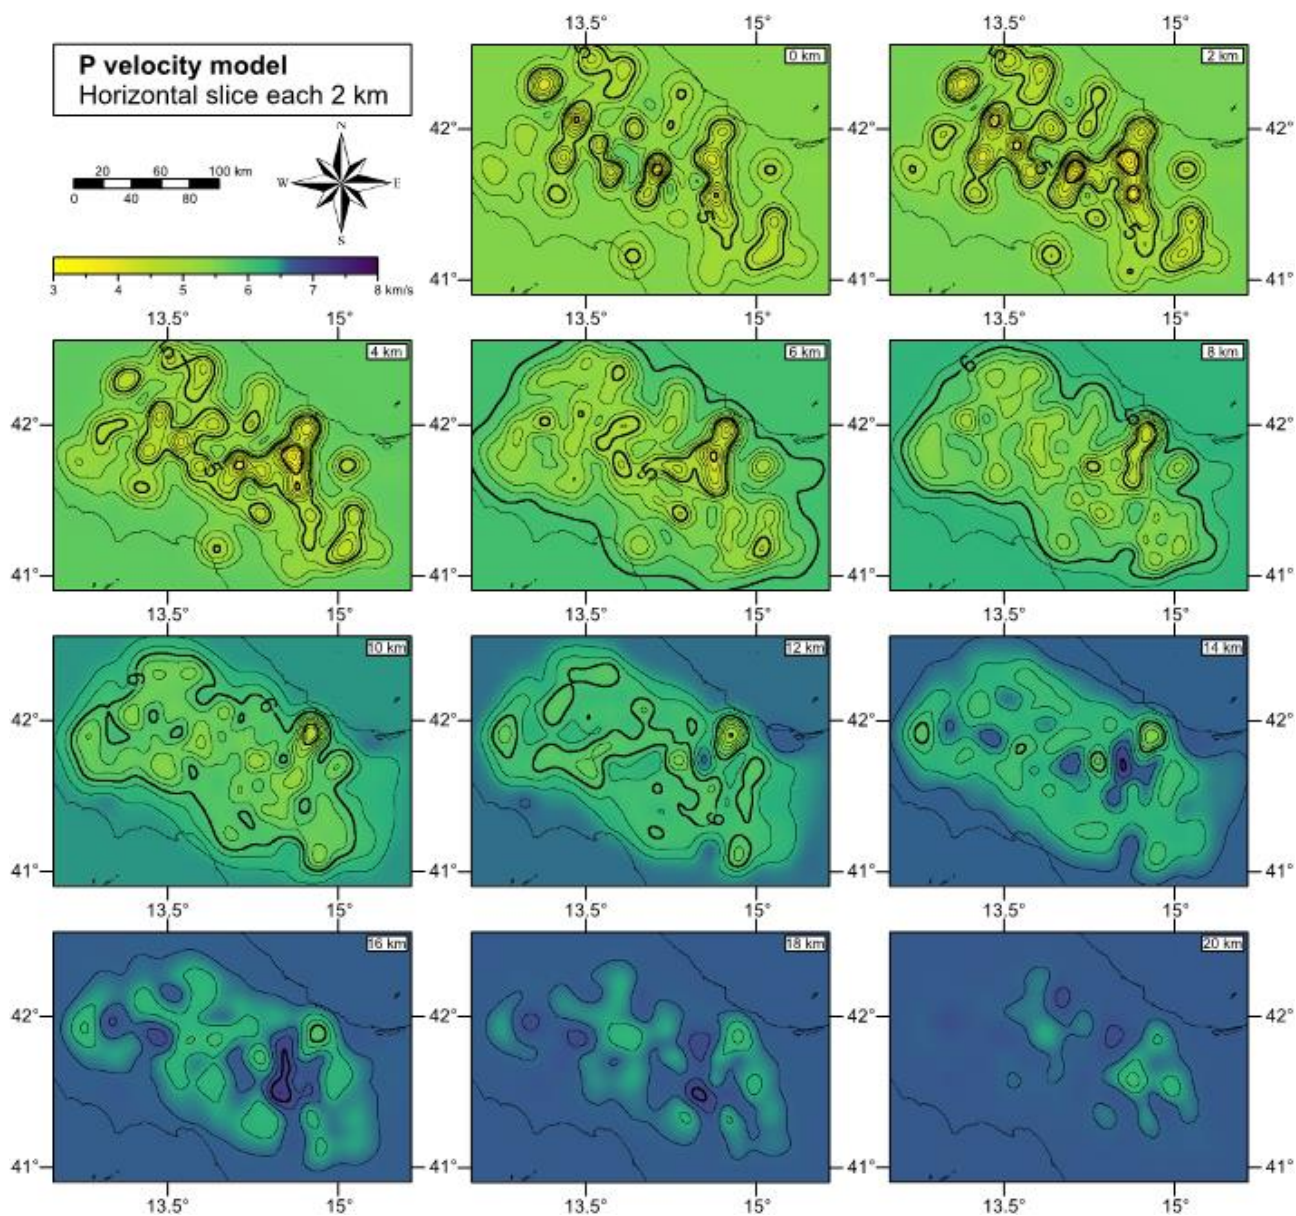

**Figure S13.** Horizontal slice of the P-velocity tomographic model. Slices have been extrapolated every 2 km in depth as indicated in the upper-right corner of each image. Main contour lines have a step of 1 km/s.

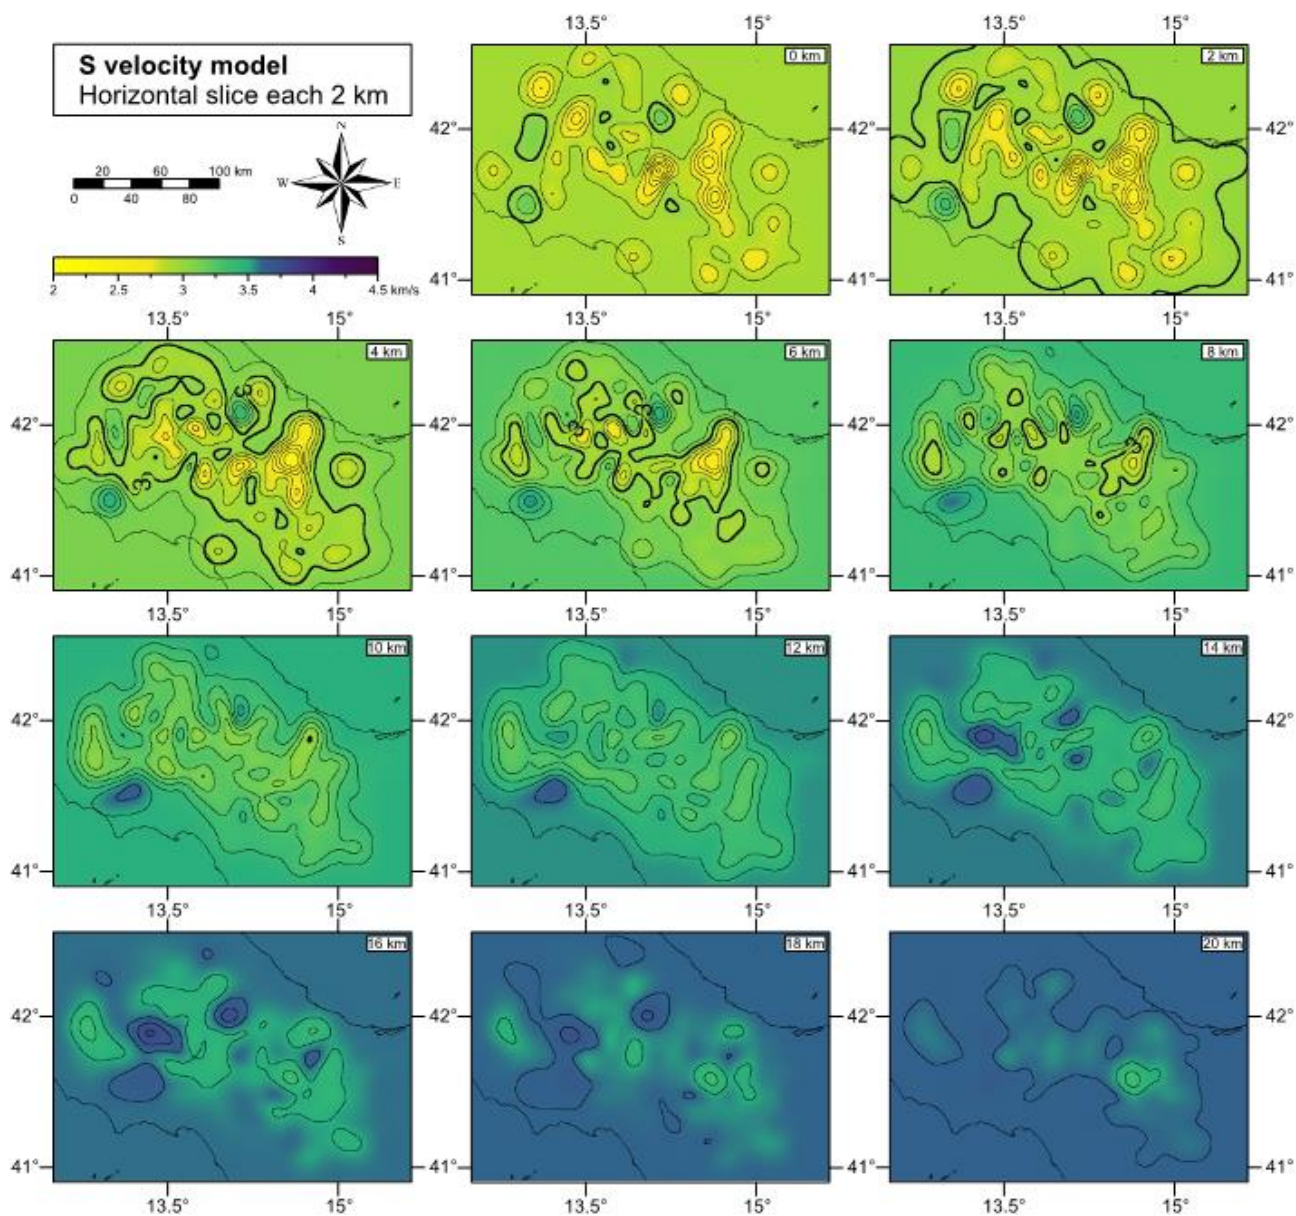

**Figure S14.** Horizontal slice of the S-velocity tomographic model. Slices have been extrapolated every 2 km in depth as indicated in the upper-right corner of each image. Main contour lines have a step of 1 km/s.



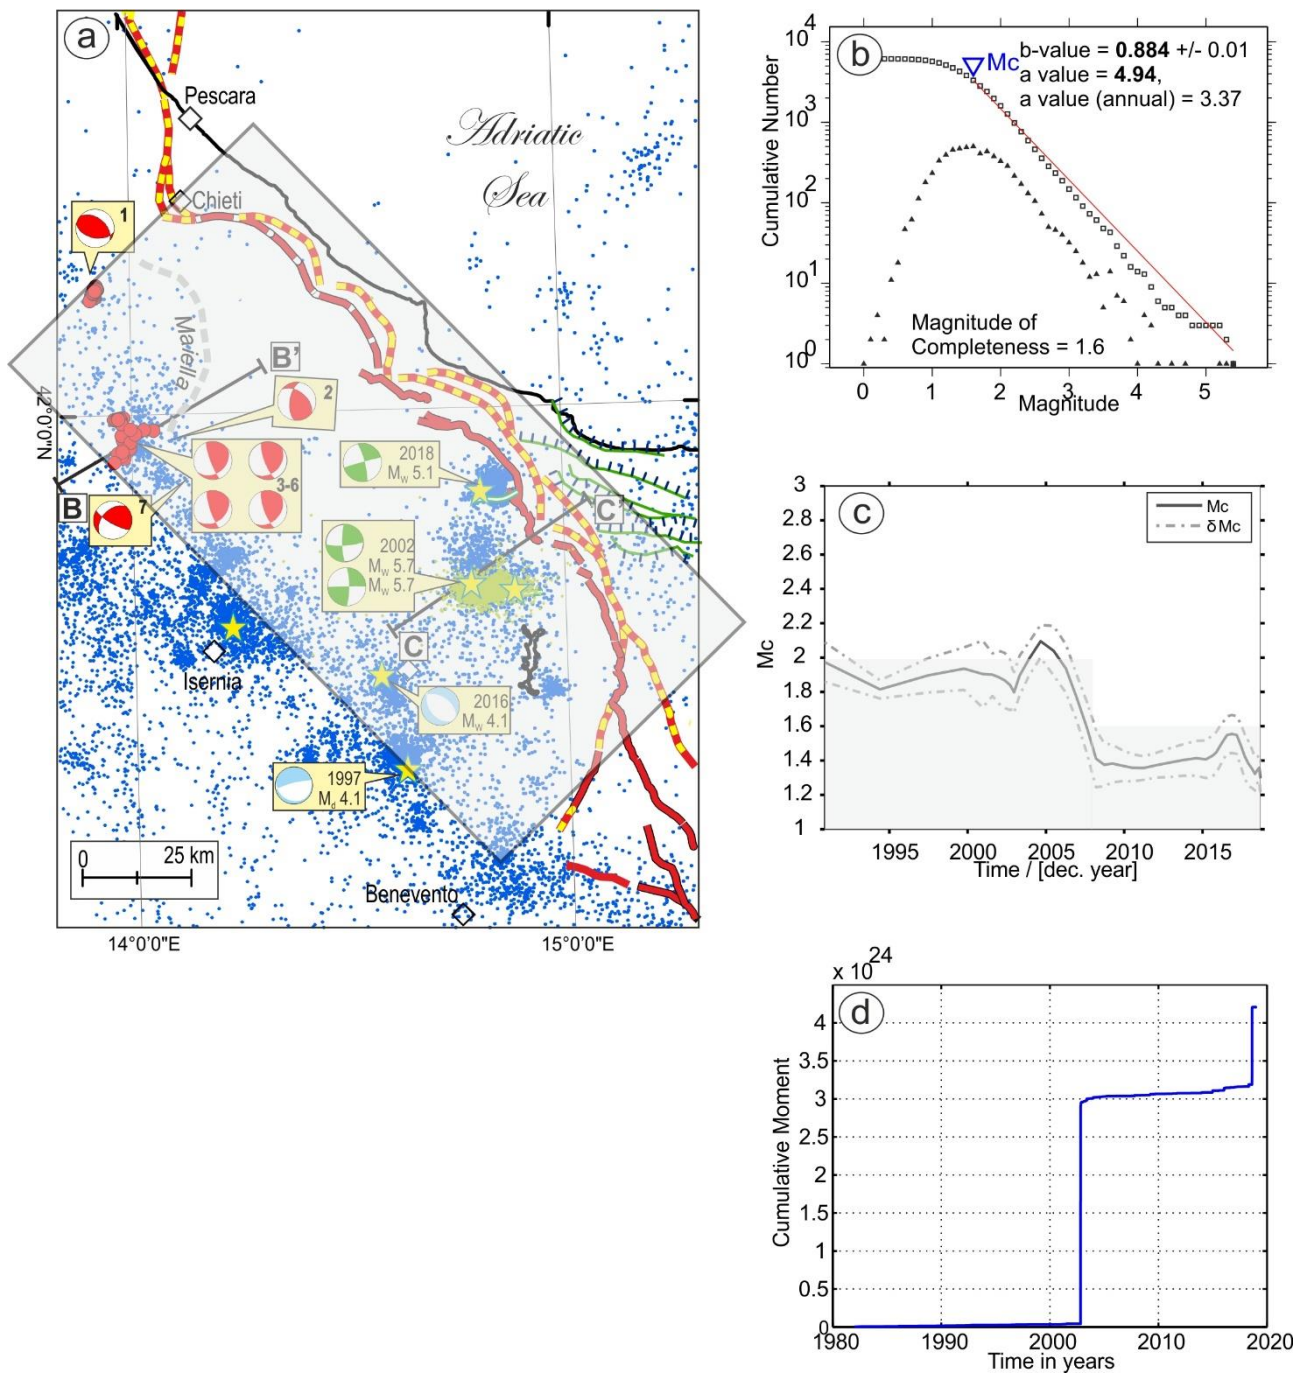

Figure S15. Analysis of the seismicity in the study area from 1981 to 2018 (Latorre et al., 2023). a) Location map. The rectangle encloses the seismic events considered in the analysis. b) Gutenberg–Richter slope evaluated with the events represented in panel a); blue triangle represents the completeness magnitude  $M_c$ . c) Completeness magnitude over time computed by the best combination of  $M_{c95}$ ,  $M_{c90}$ , and Maximum Curvature (Woessner, 2005). Its uncertainty was evaluated with the bootstrap technique (Wiemer, 2000). d) Cumulative Moment over time.



## Reference

- Adinolfi, G. M., De Matteis, R., Orefice, A., Festa, G., Zollo, A., de Nardis, R., and Lavecchia, G.: The September 27, 2012, ML 4.1, Benevento earthquake: A case of strike-slip faulting in Southern Apennines (Italy), *Tectonophysics*, 660, 35–46, <https://doi.org/10.1016/j.tecto.2015.06.036>, 2015.
- Bisio, L., Di Giovambattista, R., Milano, G., and Chiarabba, C.: Three-dimensional earthquake locations and upper crustal structure of the Sannio-Matese region (southern Italy), *Tectonophysics*, 385, 121–136, <https://doi.org/10.1016/j.tecto.2004.01.007>, 2004.
- Butler, R. W. H., Mazzoli, S., Corrado, S., De Donatis, M., Di Bucci, D., Gambini, R., Naso, G., Nicolai, C., Scrocca, D., Shiner, P., and Zucconi, V.: Applying Thick-skinned Tectonic Models to the Apennine Thrust Belt of Italy — Limitations and Implications, in: *Thrust Tectonics and Hydrocarbon Systems*, American Association of Petroleum Geologists, 647–667, <https://doi.org/10.1306/M82813C34>, 2004.
- Chiarabba, C., Bagh, S., Bianchi, I., De Gori, P., and Barchi, M.: Deep structural heterogeneities and the tectonic evolution of the Abruzzi region (Central Apennines, Italy) revealed by microseismicity, seismic tomography, and teleseismic receiver functions, *Earth and Planetary Science Letters*, 295, 462–476, <https://doi.org/10.1016/j.epsl.2010.04.028>, 2010.
- Chiarabba, C., Buttinelli, M., Cattaneo, M., and De Gori, P.: Large Earthquakes Driven by Fluid Overpressure: The Apennines Normal Faulting System Case, *Tectonics*, 39, <https://doi.org/10.1029/2019TC006014>, 2020.
- D’Ambrosio, A., Lipparini, L., Bigi, S., Cassola, T., Bambridge, V. R., Derks, J. F., and Trippetta, F.: Structural restoration and basin modelling of the central apennine orogen/foredeep/foreland system: New insights on the regional petroleum system, *Marine and Petroleum Geology*, 127, 104948, <https://doi.org/10.1016/j.marpetgeo.2021.104948>, 2021.
- Ferrarini, F., Boncio, P., de Nardis, R., Pappone, G., Cesarano, M., Aucelli, P. P. C., and Lavecchia, G.: Segmentation pattern and structural complexities in seismogenic extensional settings: The North Matese Fault System (Central Italy), *Journal of Structural Geology*, 95, 93–112, <https://doi.org/10.1016/j.jsg.2016.11.006>, 2017.
- Ferrarini, F., de Nardis, R., Brozzetti, F., Cirillo, D., Arrowsmith, J. R., and Lavecchia, G.: Multiple Lines of Evidence for a Potentially Seismogenic Fault Along the Central-Apennine (Italy) Active Extensional Belt—An Unexpected Outcome of the MW6.5 Norcia 2016 Earthquake, *Front. Earth Sci.*, 9, 642243, <https://doi.org/10.3389/feart.2021.642243>, 2021.
- Frepoli, A., Cimini, G. B., De Gori, P., De Luca, G., Marchetti, A., Monna, S., Montuori, C., and Pagliuca, N. M.: Seismic sequences and swarms in the Latium-Abruzzo-Molise Apennines (central Italy): New observations and analysis from a dense monitoring of the recent activity, *Tectonophysics*, 712–713, 312–329, <https://doi.org/10.1016/j.tecto.2017.05.026>, 2017.
- Ghisetti, F. and Vezzani, L.: Normal faulting, transcrustal permeability and seismogenesis in the Apennines (Italy), *Tectonophysics*, 348, 155–168, [https://doi.org/10.1016/S0040-1951\(01\)00254-2](https://doi.org/10.1016/S0040-1951(01)00254-2), 2002.
- Improta, L., De Gori, P., and Chiarabba, C.: New insights into crustal structure, Cenozoic magmatism, CO<sub>2</sub> degassing, and seismogenesis in the southern Apennines and Irpinia region from local earthquake tomography: seismic tomography of Apennines, *J. Geophys. Res. Solid Earth*, 119, 8283–8311, <https://doi.org/10.1002/2013JB010890>, 2014.

- 115 Latorre, D., Di Stefano, R., Castello, B., Michele, M., and Chiaraluce, L.: An updated view of the Italian seismicity from probabilistic location in 3D velocity models: The 1981–2018 Italian catalog of absolute earthquake locations (CLASS), *Tectonophysics*, 846, 229664, <https://doi.org/10.1016/j.tecto.2022.229664>, 2023.
- Mostardini, F. and Merlini, S.: Appennino Centro Meridionale - Sezioni Geologiche e Proposta di Modello Strutturale, *Mem. Soc. Geol. It.*, 177–202, 1986.
- 120 Patacca, E., Scandone, P., Di Luzio, E., Cavinato, G. P., and Parotto, M.: Structural architecture of the central Apennines: Interpretation of the CROP 11 seismic profile from the Adriatic coast to the orographic divide: CROP 11 SEISMIC PROFILE, *Tectonics*, 27, n/a-n/a, <https://doi.org/10.1029/2005TC001917>, 2008.
- Romano, M. A., De Nardis, R., Garbin, M., Peruzza, L., Priolo, E., Lavecchia, G., and Romanelli, M.: Temporary seismic monitoring of the Sulmona area (Abruzzo, Italy): a quality study of microearthquake locations, *Nat. Hazards Earth Syst. Sci.*, 13, 2727–2744, <https://doi.org/10.5194/nhess-13-2727-2013>, 2013.
- 125 Rovida, A., Locati, M., Camassi, R., Lolli, B., and Gasperini, P.: The Italian earthquake catalogue CPTI15, *Bulletin of Earthquake Engineering*, 18, 2953–2984, <https://doi.org/10.1007/s10518-020-00818-y>, 2020.
- Rovida, A., Locati, M., Camassi, R., Lolli, B., Gasperini, P., and Antonucci, A.: Catalogo Parametrico dei Terremoti Italiani (CPTI15), versione 4.0 (4.0), <https://doi.org/10.13127/CPTI/CPTI15.4>, 2022.
- 130 Scafidi, D., Solarino, S., and Eva, C.: P wave seismic velocity and  $V_p/V_s$  ratio beneath the Italian peninsula from local earthquake tomography, *Tectonophysics*, 465, 1–23, <https://doi.org/10.1016/j.tecto.2008.07.013>, 2009.
- Speranza, F. and Chiappini, M.: Thick-skinned tectonics in the external Apennines, Italy: New evidence from magnetic anomaly analysis: THICK-SKINNED TECTONICS IN THE APENNINES, *J. Geophys. Res.*, 107, ETG 8-1-ETG 8-19, <https://doi.org/10.1029/2000JB000027>, 2002.
- 135 Trionfera, B., Frepoli, A., De Luca, G., De Gori, P., and Doglioni, C.: The 2013–2018 Matese and Beneventano Seismic Sequences (Central–Southern Apennines): New Constraints on the Hypocentral Depth Determination, *Geosciences*, 10, 17, <https://doi.org/10.3390/geosciences10010017>, 2019.
- Vezzani, L., Festa, A., and Ghisetti, F. C.: Geology and Tectonic Evolution of the Central-Southern Apennines, Italy, in: *Geology and Tectonic Evolution of the Central-Southern Apennines, Italy*, Geological Society of America, <https://doi.org/10.1130/2010.2469>, 2010.
- 140 Wiemer, S.: Minimum Magnitude of Completeness in Earthquake Catalogs: Examples from Alaska, the Western United States, and Japan, *Bulletin of the Seismological Society of America*, 90, 859–869, <https://doi.org/10.1785/0119990114>, 2000.
- Woessner, J.: Assessing the Quality of Earthquake Catalogues: Estimating the Magnitude of Completeness and Its Uncertainty, *Bulletin of the Seismological Society of America*, 95, 684–698, <https://doi.org/10.1785/0120040007>, 2005.
